# Supplementary material for: Investigation of carbapenemases and aminoglycoside modifying enzymes of Acinetobacter baumannii isolates recovered from patients admitted to intensive care units in a tertiary-care hospital in Brazil
Source: PubMed Central journal article supplement (PMC7083385; doi:10.1590/0037-8682-0094-2019), 2019-12-20

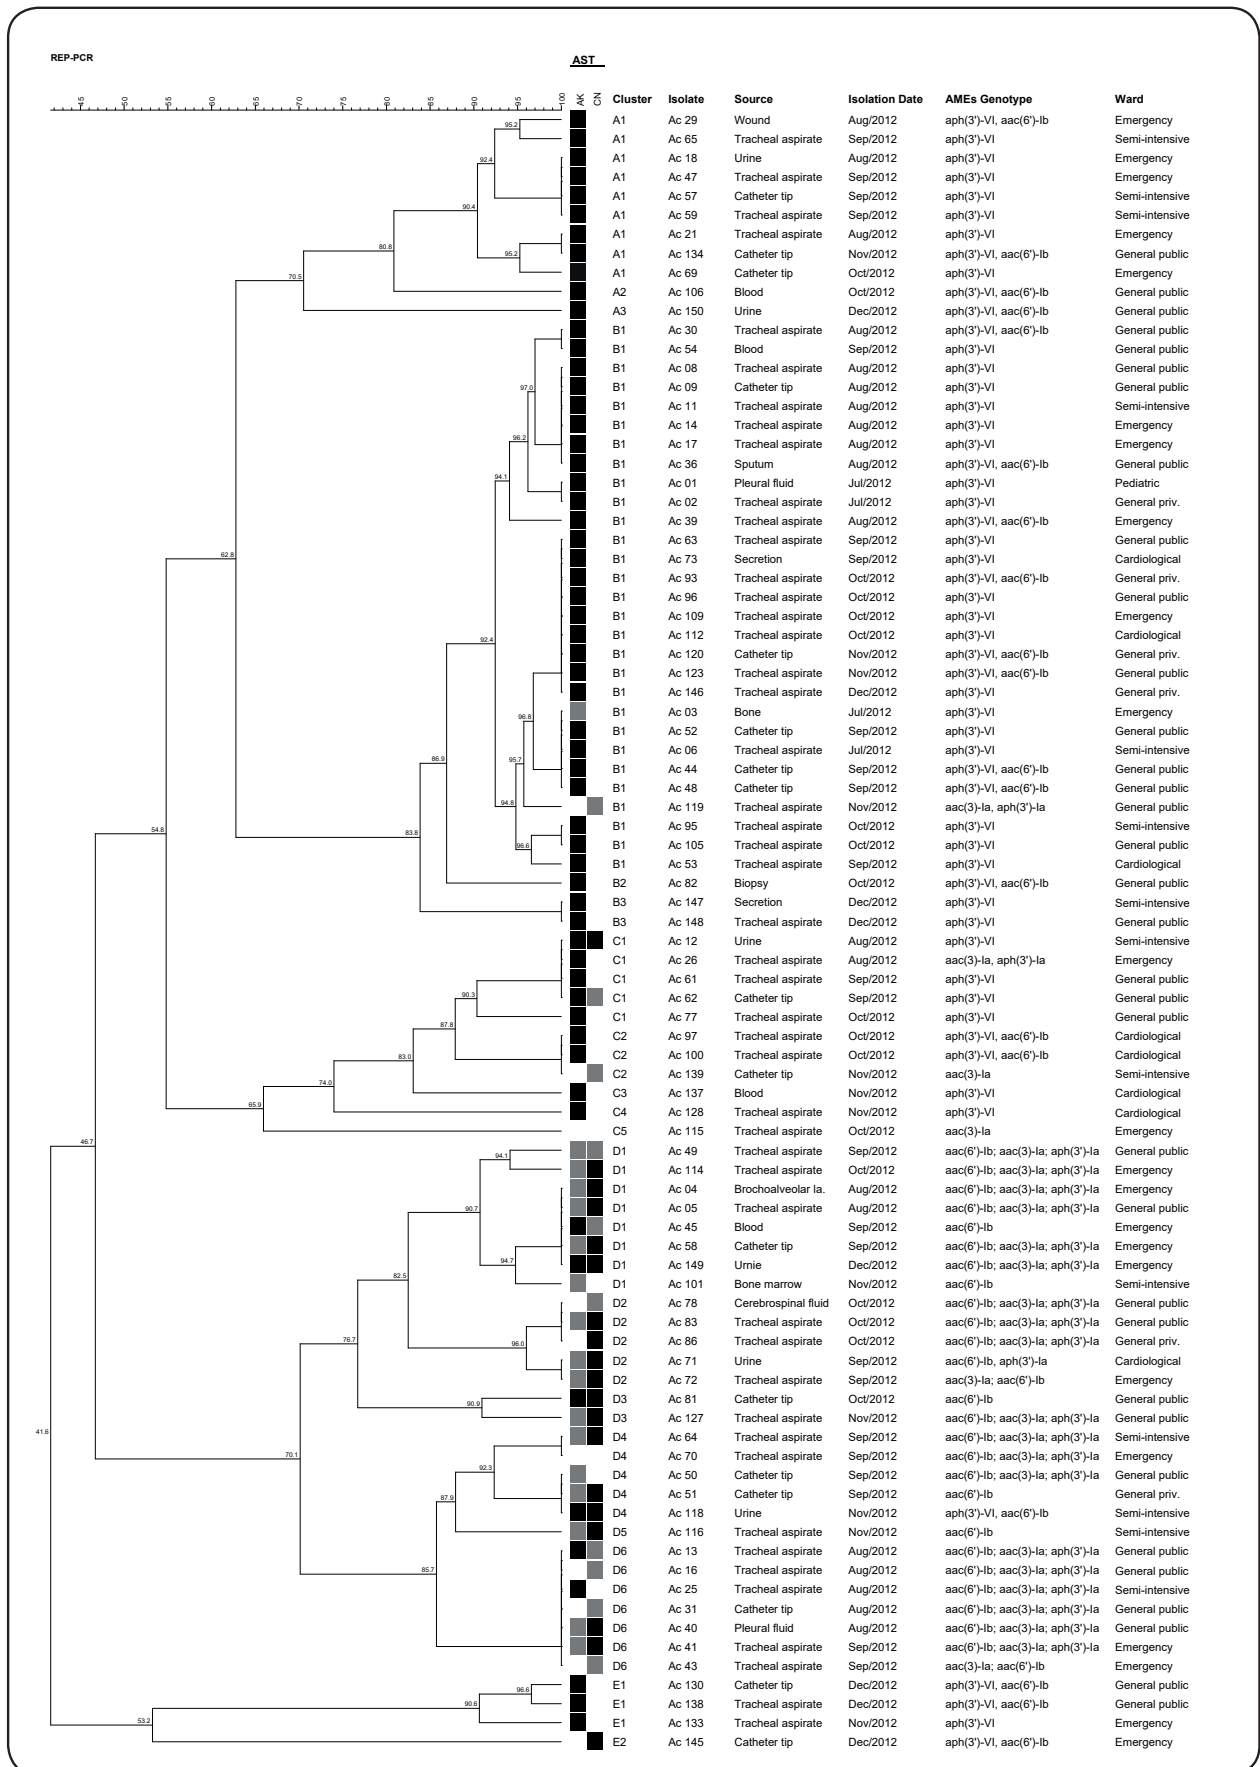

FIGURE 1: REP-PCR patterns of 86 CR *A. baumannii* carrying AMEs, and their respective susceptibility phenotypes to aminoglycosides (AS), source of isolation, and ICU. Squares represent resistance (black), intermediate susceptibility (gray), and sensitivity (white) to aminoglycosides.

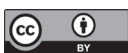

Supplement: 1678-9849-rsbmt-53-e20190094-suppl1.pdf [file 1678-9849-rsbmt-53-e20190094-suppl1.pdf]
